# Supplementary material for: Interdisciplinary Study of the Effects of Dipeptidyl-Peptidase III Cancer Mutations on the KEAP1-NRF2 Signaling Pathway
Source: MDPI journal article supplement (doi:10.3390/ijms23041994), 2022-02-11
Supplement: s1 [file s1]

## **Interdisciplinary Study of the Effects of Dipeptidyl-peptidase III Cancer Mutations on the KEAP1-NRF2 Signaling Pathway**

Sara Matić, Ana Tomašić Paić, Sandra Sobočanec, Marija Pinterić, Goran Pipalović, Monika Martinčić, Mihaela Matovina \* and Sanja Tomić

### **Content**

|              |   |
|--------------|---|
| 1. Table S1  | 2 |
| 2. Table S2  | 3 |
| 3. Table S3  | 4 |
| 4. Table S4  | 5 |
| 5. Figure S1 | 5 |
| 6. Figure S2 | 6 |
| 7. Figure S3 | 7 |

**Table S1.** The first a) and second b) sets of  $K_d$  values determined by initial fluorescence change measurements performed on the MST instrument for the binding of DPP III variants to a labeled Kelch domain. Measurements were performed in triplicate. For each set of measurements, the newly labeled Kelch was used.

a)

| <b>DPP III</b> | <b><math>K_d</math> (mol dm<sup>-3</sup>)</b> |
|----------------|-----------------------------------------------|
| <b>WT</b>      | $(8,3 \pm 1,1) \times 10^{-7}$                |
| <b>E451K</b>   | $(4,0 \pm 0,5) \times 10^{-7}$                |
| <b>P479S</b>   | $(4,5 \pm 4,9) \times 10^{-8}$                |
| <b>G482C</b>   | $(1,0 \pm 0,4) \times 10^{-6}$                |
| <b>Q484H</b>   | $(3,9 \pm 1,1) \times 10^{-7}$                |
| <b>R638L</b>   | $(4,1 \pm 0,6) \times 10^{-7}$                |
| <b>R638W</b>   | $(4,1 \pm 0,5) \times 10^{-7}$                |
| <b>R703C</b>   | $(4,8 \pm 0,8) \times 10^{-7}$                |
| <b>R703H</b>   | $(1,0 \pm 0,1) \times 10^{-6}$                |

b)

| <b>DPP III</b> | <b><math>K_d</math> (mol dm<sup>-3</sup>)</b> |
|----------------|-----------------------------------------------|
| <b>DT</b>      | $(1,9 \pm 0,7) \times 10^{-7}$                |
| <b>E480Q</b>   | $(1,6 \pm 0,4) \times 10^{-6}$                |
| <b>T481M</b>   | $(2,3 \pm 0,4) \times 10^{-6}$                |
| <b>R510W</b>   | $(6,3 \pm 2,0) \times 10^{-7}$                |
| <b>V514M</b>   | $(2,3 \pm 0,9) \times 10^{-7}$                |

**Table S2.** The intermolecular hydrogen bonds formed during MD simulations of the complex Kelch - DPP III WT and mutant variants in the intervals with minimum calculated MMGBSA energy.

| DPP III | Kelch | WT   | P479S | E480Q | T481M | G482C | R510W |
|---------|-------|------|-------|-------|-------|-------|-------|
| Q463    | P384  |      |       | 0.52  |       |       |       |
| E465    | R336  | 0.35 |       |       |       |       |       |
| K466    | Q337  |      | 0.54  |       |       |       |       |
| G467    | N387  |      | 0.68  |       |       |       |       |
| G467    | S383  |      | 0.43  |       |       |       |       |
| A468    | Q337  |      | 0.50  |       |       |       |       |
| F469    | Y334  |      | 0.81  |       |       |       |       |
| F469    | R336  |      |       |       |       |       | 0.13  |
| N470    | Q337  |      |       | 0.37  |       |       |       |
| F471    | R336  |      |       | 0.64  |       |       |       |
| Q473    | Y572  |      |       | 0.27  |       |       |       |
| Q473    | R336  |      | 0.13  |       |       |       |       |
| Q473    | G574  |      | 0.42  |       | 0.41  | 0.24  | 0.65  |
| Q473    | H575  | 0.48 | 0.19  |       |       |       |       |
| Q473    | Y572  |      | 0.21  |       |       |       |       |
| Q473    | Q530  |      |       |       |       | 0.49  |       |
| E474    | H575  | 0.55 |       |       |       |       |       |
| N478    | R483  |      |       |       | 0.10  |       |       |
| P/S479  | Q530  | 0.80 | 0.72  | 0.75  | 0.67  | 0.64  | 0.72  |
| E/Q480  | S555  | 0.86 | 0.96  | 0.94  | 1.00  | 0.97  | 0.98  |
| E/Q480  | R483  | 1.73 | 2.04  | 0.83  | 1.67  | 1.62  | 1.68  |
| E/Q480  | S508  | 0.98 | 0.93  | 0.49  | 0.90  | 0.92  | 1.00  |
| E/Q480  | R415  | 1.70 |       |       | 1.79  | 1.86  | 1.60  |
| T/M481  | S602  |      | 1.12  |       |       | 0.80  | 0.89  |
| G/C482  | Y334  |      |       |       |       | 0.18  |       |
| E483    | N414  | 0.81 |       |       |       |       |       |
| E483    | R415  |      | 1.87  | 0.90  |       |       |       |
| E483    | S363  |      | 0.98  |       |       |       |       |
| E483    | S602  |      | 0.95  |       |       |       |       |
| E483    | N387  |      |       | 0.12  | 0.72  | 0.77  |       |
| E483    | R380  |      |       | 0.93  | 0.87  | 0.94  | 0.85  |
| Q484    | R336  |      |       |       | 1.05  |       | 0.12  |
| Q484    | Y334  |      |       | 0.14  |       |       | 0.40  |
| Q484    | R380  | 0.82 |       |       | 0.56  |       |       |
| Q484    | N387  |      |       |       | 0.88  |       |       |
| Q484    | S363  | 0.12 |       |       |       |       |       |
| Q484    | N381  | 0.59 |       |       |       |       |       |
| I485    | N387  | 0.73 |       |       |       |       |       |
| Q486    | Y334  |      |       |       |       |       | 0.16  |
| Q486    | R336  |      |       |       |       |       | 0.54  |
| Q486    | N387  | 1.02 |       | 0.47  |       | 0.73  | 0.14  |
| Q486    | D389  | 0.66 |       |       |       |       |       |
| Q486    | R380  |      | 0.72  | 0.34  |       |       |       |
| W489    | D385  |      |       | 0.37  |       |       |       |
| R490    | P384  |      | 0.64  |       |       |       |       |
| R490    | N387  |      | 0.92  |       |       |       |       |
| R490    | S383  |      | 0.39  |       |       |       |       |
| K498    | D385  |      |       | 0.70  |       |       |       |
| E581    | R459  |      | 0.74  |       | 1.74  |       | 1.38  |
| E619    | T481  | 0.61 | 0.47  |       |       |       |       |
| R620    | D479  | 1.32 | 1.27  |       |       |       |       |
| R620    | T481  |      |       |       | 0.20  |       | 0.23  |
| R623    | G480  | 0.27 |       |       |       |       |       |
| R623    | C434  | 0.30 |       |       |       |       |       |
| R624    | C434  |      |       |       |       | 0.29  |       |
| R624    | H436  |      |       |       | 0.51  |       |       |
| R624    | D479  |      | 0.51  |       |       |       |       |
| D633    | R380  |      | 1.41  |       |       |       |       |

|      |      |  |  |  |  |  |      |
|------|------|--|--|--|--|--|------|
| D633 | N387 |  |  |  |  |  | 1.53 |
| A635 | D385 |  |  |  |  |  | 0.25 |
| A635 | T388 |  |  |  |  |  | 0.36 |

**Table S3.** Primers used for site directed mutagenesis in DPP III genes by QuickChange mutagenesis protocol. For each of the introduced mutations, a primer is listed in the main (F, forward) and complementary (R, reverse) chain, in the 5'→3' direction.

| mutation of DPP III | -primer sequence-                             |
|---------------------|-----------------------------------------------|
| <b>E451K</b>        | F- 5'-CAGGTGGGCCTGCACAAGCTGCTGGGCCATGGC- 3'   |
|                     | R- 5'-GCCATGGCCCAGCAGCTTGTGCAGGCCACCTG- 3'    |
| <b>P479S</b>        | F- 5'-GAAACAGTGATCAACTCAGAGACGGGCGAGC-3'      |
|                     | R- 5'-GCTCGCCCGTCTCTGAGTTGATCACTGTTTC- 3'     |
| <b>E480Q</b>        | F- 5'-GTGATCAACCCACAGACGGGCGAGCAG- 3'         |
|                     | R- 5'-CTGCTCGCCCGTCTGTGGGTTGATCAC- 3'         |
| <b>T481M</b>        | F- 5'-GATCAACCCAGAGATGGGCGAGCAGATTC- 3'       |
|                     | R- 5'-GAATCTGCTCGCCCATCTCTGGGTTGATC- 3'       |
| <b>G482C</b>        | F- 5'-CAACCCAGAGACGTGCGAGCAGATTCAG-3'         |
|                     | R- 5'-CTGAATCTGCTCGCACGTCTCTGGGTTG-3'         |
| <b>Q484H</b>        | F- 5'-GAGACGGGCGAGCACATTCAGAGCTGGTATC-3'      |
|                     | R- 5'-GATACCAGCTCTGAATGTGCTCGCCCGTCTC-3'      |
| <b>R638L</b>        | F- 5'-GATGTGGCCGGAGGGCTGGCCCTGTACGAGG-3'      |
|                     | R- 5'-CCTCGTACAGGGCCAGCCCTCCGGCCACATC-3'      |
| <b>R638W</b>        | F- 5'-GATGTGGCCGGAGGGTGGGCCCTGTACGAGG-3'      |
|                     | R- 5'-CCTCGTACAGGGCCACCCCTCCGGCCACATC-3'      |
| <b>R703C</b>        | F- 5'-CCATCCTCTGGGAAACACTCAGAGAAGGATCGG -3'   |
|                     | R- 5'-CCGATCCTTCTCTGAGTGTTTCCAGAGGATGG -3'    |
| <b>R703H</b>        | F- 5'-GTCCATCCTCTGGGAAATGCTCAGAGAAGGATCGG -3' |
|                     | R- 5'-CCGATCCTTCTCTGAGCATTTCCAGAGGATGGAC -3'  |

**Table S4.** Primers used for RT-qPCR

| Gene/Primers                            | Primer sequence                                                                                     | Product size/pb | Reaction Efficiency /% | Ref.                   |
|-----------------------------------------|-----------------------------------------------------------------------------------------------------|-----------------|------------------------|------------------------|
| <b>GAPDH</b><br>GAPDH-FOR/REV           | GAGTCAACGGATTGGTCGT<br>GACAAGCTTCCCCTTCTCAG                                                         | 185             | 96,31                  | (Wang et al., 2017)    |
| <b>TUBG1</b><br>TUBG1-QP-F/R            | TCAGGGACCTCACGCATCTCTTTC<br>TGTGTTTGCAGGCCAACAGAGAG                                                 | 60              | 102,53                 | QuantPrime*            |
| <b>NRF2</b><br>NRF2-Ori-F/R             | CACATCCAGTCAGAAACCAGTGG<br>GGAATGTCTGCGCCAAAAGCTG                                                   | 112             | 96,48                  | Origene primers        |
| <b>NQO1</b><br>NQO1-Ori-F/R             | CCTGCCATTCTGAAAGGCTGGT<br>GTGGTGATGGAAAGCACTGCCT                                                    | 119             | 89,02                  | Origene primers        |
| <b>HMOX1</b><br>HMOX1-Ori-F/R           | CCAGGCAGAGAATGCTGAGTTC<br>AAGACTGGGCTCTCCTTGTTC                                                     | 144             | 98,97                  | Origene primers        |
| <b>PRDX1</b><br>PRDX1-F/R               | GGGCACACAAAGGTGAAGTC<br>GCTGTTATGCCAGATGGTCAG                                                       | 104             | 96,07                  | (Bollong et al., 2018) |
| <b>SOD1</b><br>SOD1-QP-F/R              | GCGGAGGTCTGGCCTATAAAGTAG<br>AGGAGACTACGACGCAAACCAG                                                  | 62              | 105,47                 | QuantPrime*            |
| <b>GCLM</b><br>GCLM-QP-F/R              | TCAGTCCTTGGAGTTGCACAGC<br>TCCTCCCAGTAAGGCTGTAAATGC                                                  | 104             | 100,55                 | QuantPrime*            |
| <b>SLC7A11 (xCT)</b><br>SLC7A11-Ori-F/R | TCCTGCTTTGGCTCCATGAACG<br>AGAGGAGTGTGCTTGC GGACAT                                                   | 122             | 96,83                  | Origene primers        |
| <b>GPX1</b><br>GPX1-Ori-F/R             | GTGCTCGGCTTCCCGTGCAAC<br>CTCGAAGAGCATGAAGTTGGGC<br>AGGAGACTACGACGCAAACCAG<br>CTCGAAGAGCATGAAGTTGGGC | 124             | 104,26                 | Origene primers        |

\* primers constructed with QuantPrime software

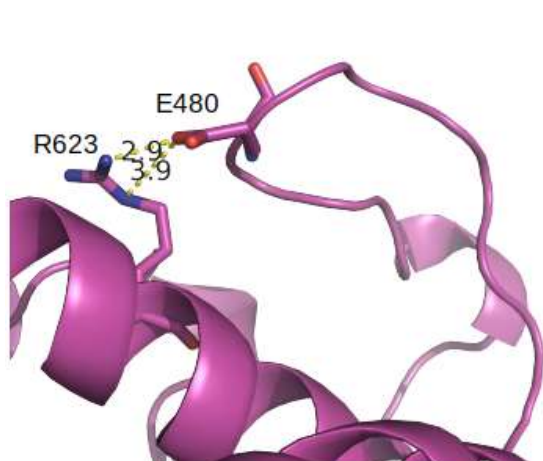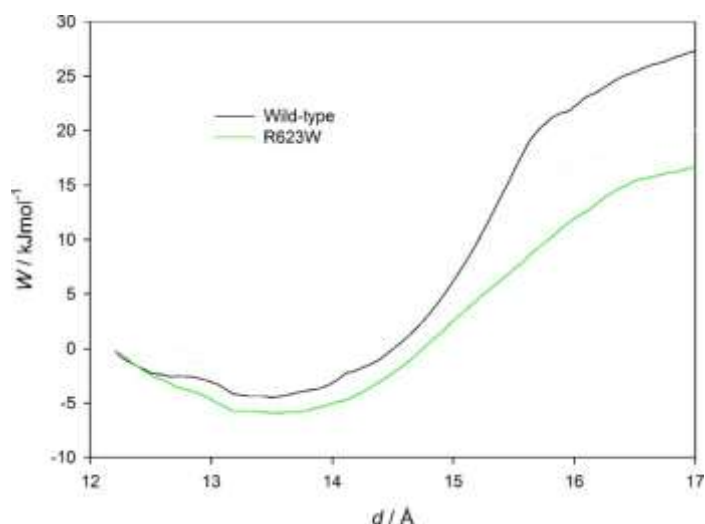

**Figure S1.** Left – Interaction between E480 and R623. Right – Work needed to detach the E<sup>480</sup>TGE<sup>483</sup> loop from the surface of the wild-type DPP III and the R623W variant.

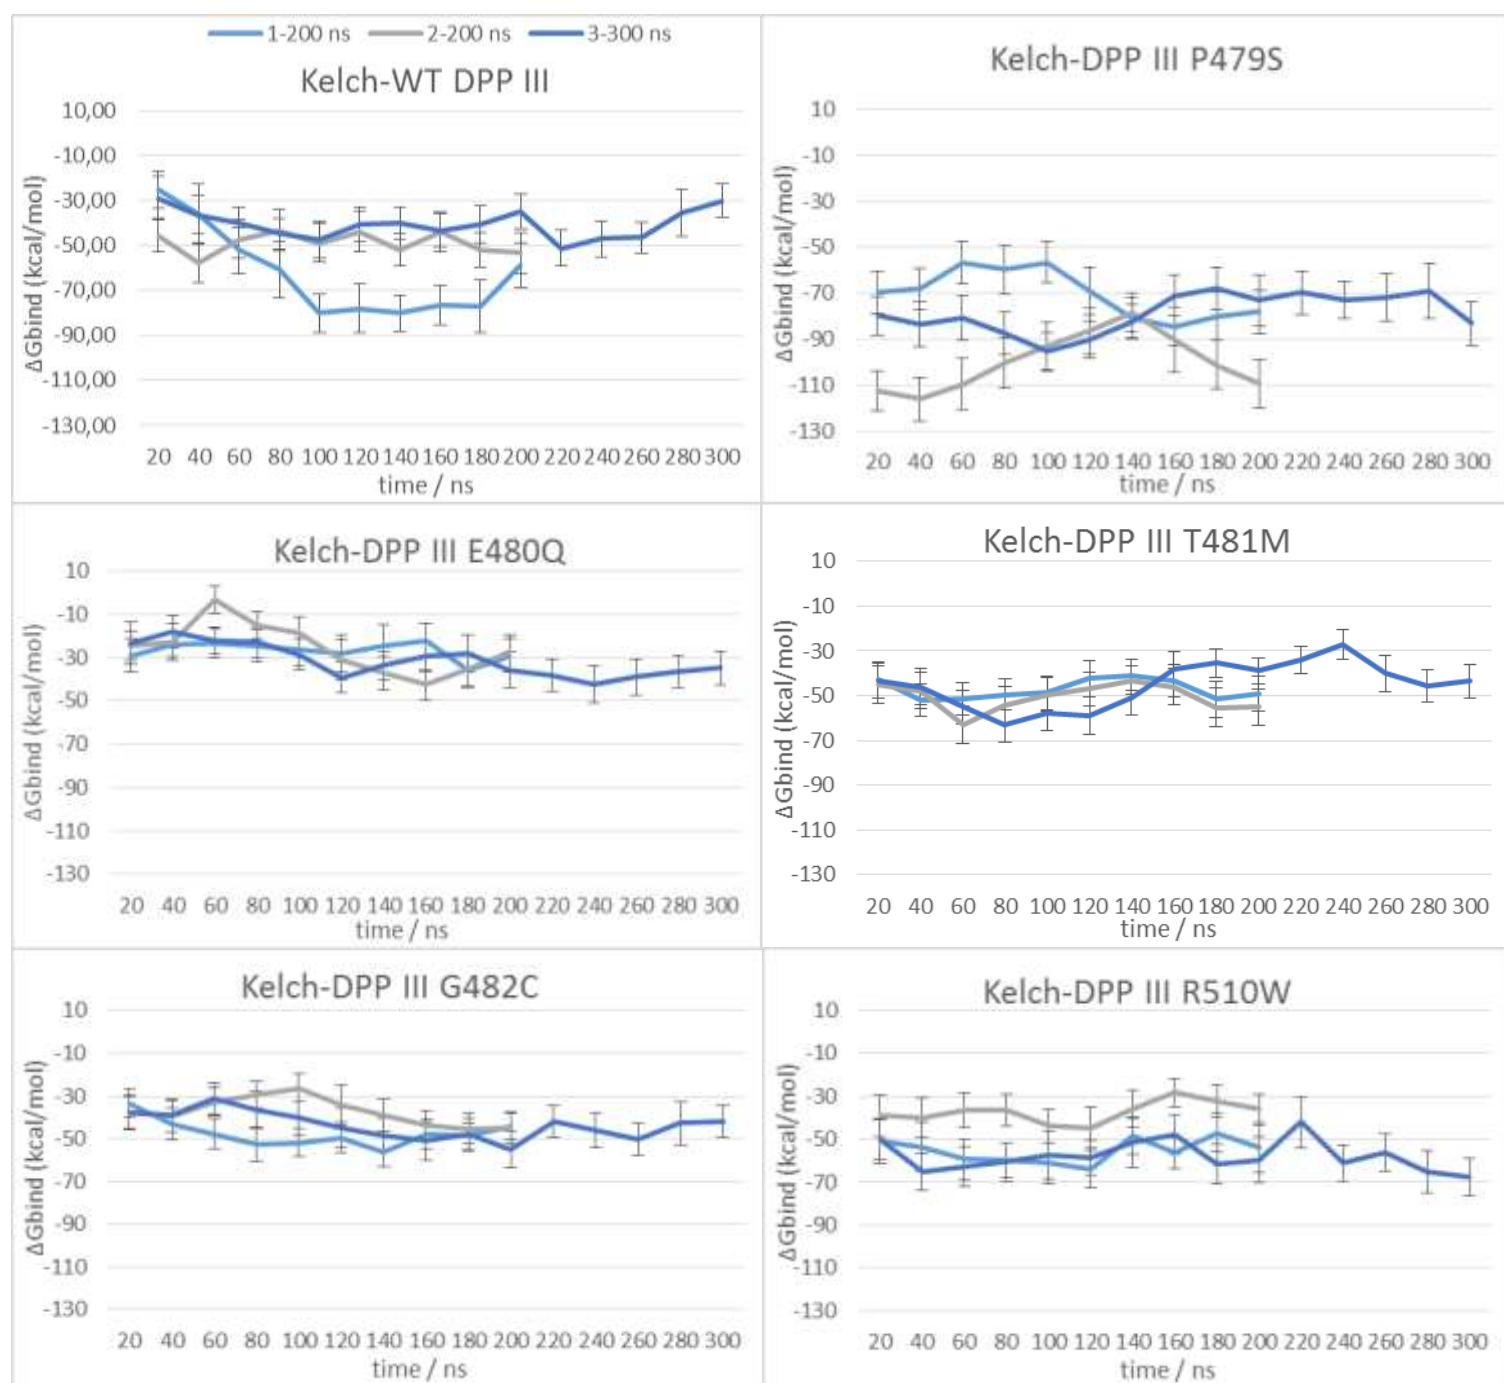

**Figure S2.** Relative free energies of binding of two interactor proteins in the Kelch - DPP III complexes calculated by the MM-GBSA method. Values were calculated at intervals of 20 ns for each of the three independent MD trajectories for DPP III variants in the complex with Kelch domain, and standard deviations are given as error bars.

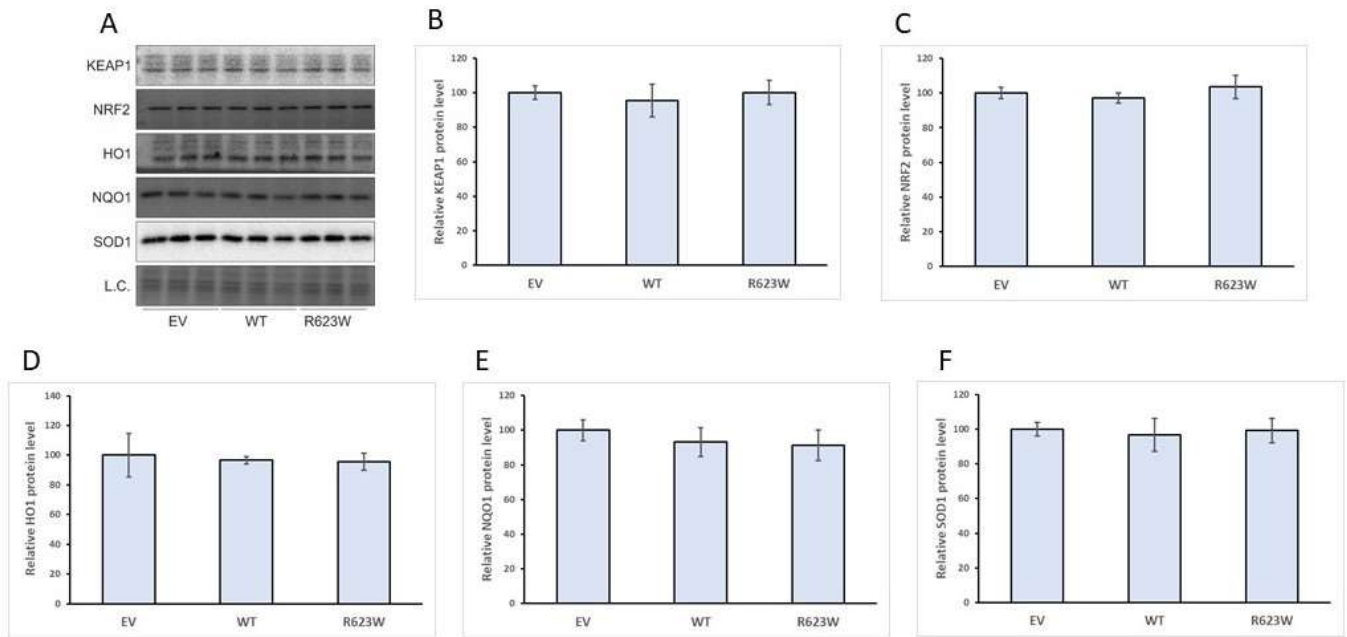

**Figure S3.** Western blot analysis of the expression of KEAP1, NRF2, HO1, NQO1 and SOD1 in EV, WT DPP III and DPPIII-R623W transfected HEK293T cells (A); A graphical display of the averaged densitometry values obtained by the analysis of the western blot bands in ImageLab v. 6.1.0. (Bio-Rad Laboratories, Inc.), normalized with loading control (L.C.) for KEAP1 (B), NRF2 (C), HO1 (E), NQO1 (D) and SOD1 (F) protein expression is presented.
